# Supplementary material for: De Novo Whole-Genome Sequencing and Assembly of the Yellow-Throated Bunting (Emberiza elegans) Provides Insights into Its Evolutionary Adaptation
Source: MDPI journal article supplement (doi:10.3390/ani12152004), 2022-08-08
Supplement: s1 [file s1]

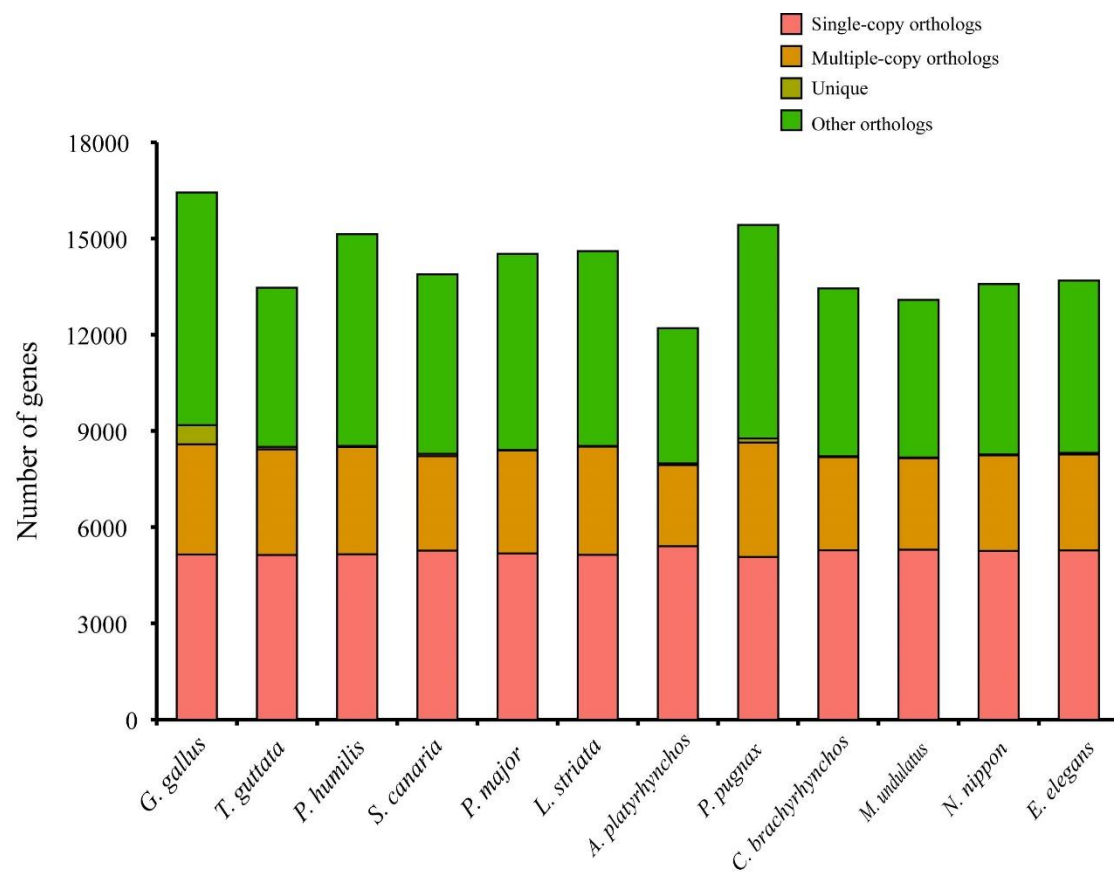

**Figure S1.** The number of different orthologous genes within the 12 avian species. X-axis denotes species, while the Y-axis indicates the number of genes. The single-copy orthologous, multiple-copy orthologous, species-specific orthologous, and other orthologous of each species are represented by red, orange, brown, and green, respectively.

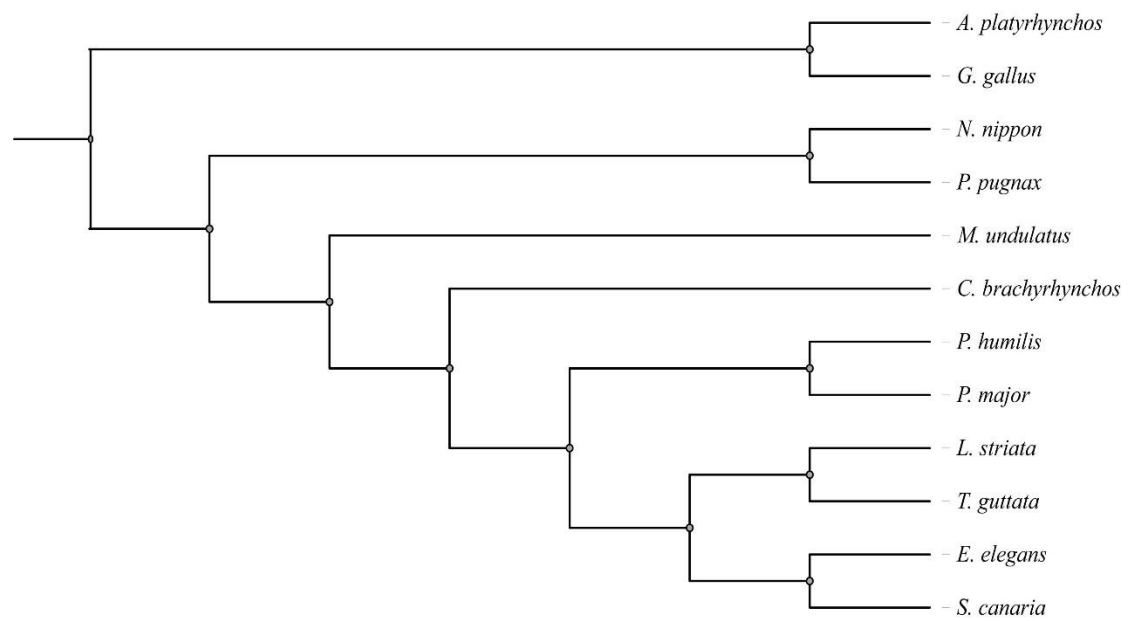

**Figure S2.** Species trees of 12 birds were constructed using maximum-likelihood trees of each single-copy orthologous gene family using MP-EST.

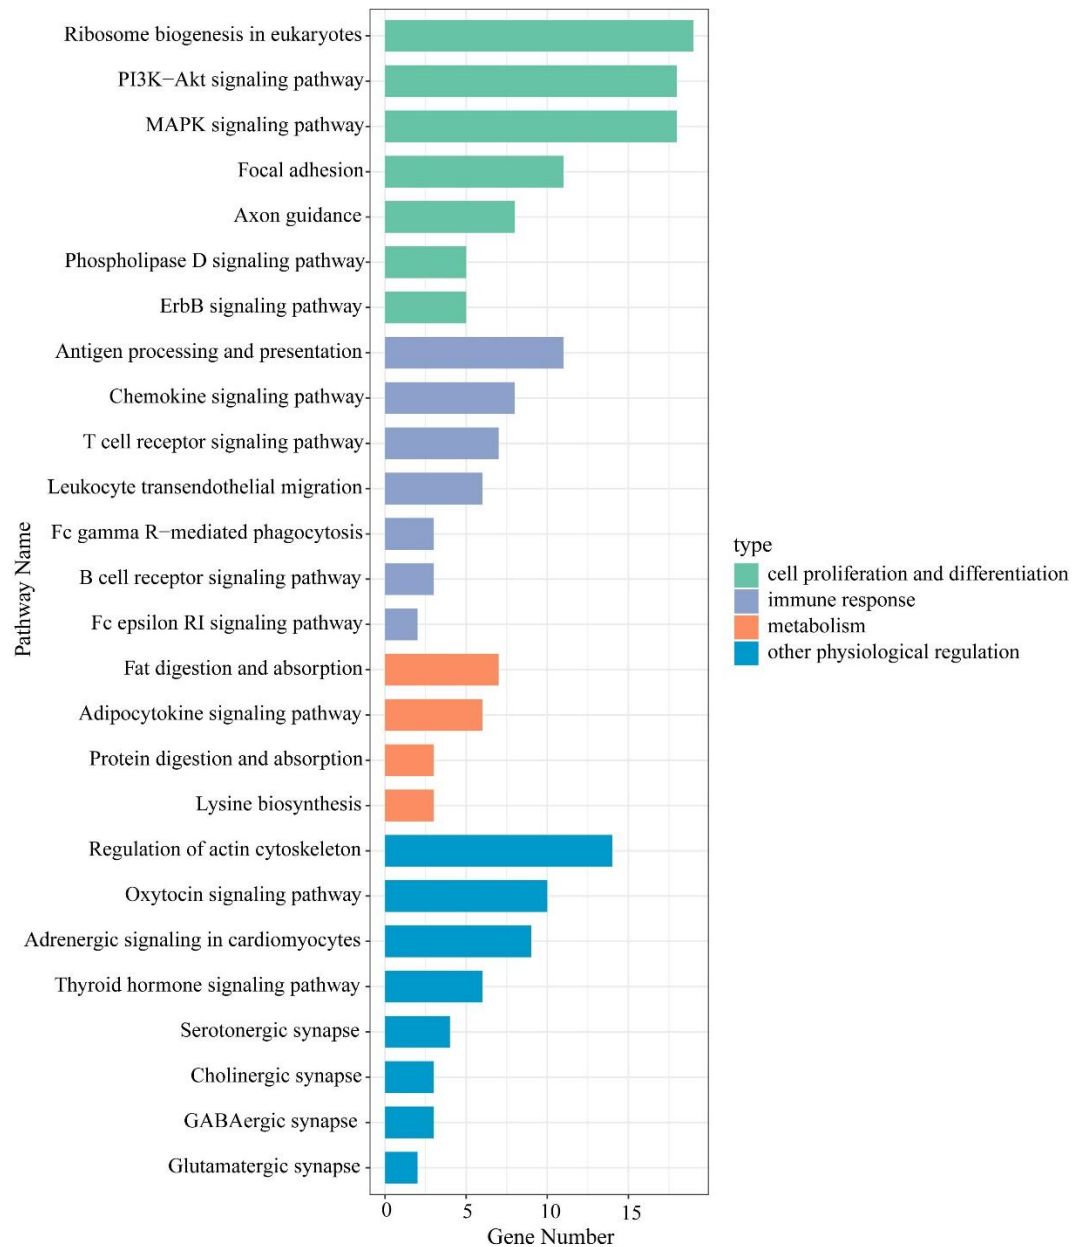

**Figure S3.** Horizontal bar plots represent significantly enriched positively selected gene pathway types and gene numbers. The horizontal axis is the number of genes, and the vertical axis is the pathway's name.

**Table S1.** Genomic characteristics statistics of *E. elegans* obtained by using K-mer analysis.

| K-mer | K-mer number   | K-mer<br>Depth | Genome Size<br>(Mbp) | Revised Genome<br>Size (Mbp) | Heterozygous<br>Ratio (%) | Repeat<br>(%) |
|-------|----------------|----------------|----------------------|------------------------------|---------------------------|---------------|
| 17    | 62,559,975,660 | 42             | 1,489.52             | 1,486.61                     | 0.66                      | 47.81         |

**Table S2.** Repetitive element statistics.

| Type         | Length (bp) | Percentage (%) |
|--------------|-------------|----------------|
| DNAs         | 1,112,875   | 0.10           |
| LINEs        | 40,322,527  | 3.52           |
| SINEs        | 97,924      | 0.01           |
| LTRs         | 151,768,505 | 13.26          |
| Unclassified | 9,606,478   | 0.84           |
| Total        | 190,253,193 | 16.62          |

Note: Abbreviations indicate DNA transposons (DNAs), long interspersed nuclear elements (LINEs), short interspersed nuclear elements (SINEs), and long terminal repeats (LTRs).

**Table S3.** Statistical analysis of functional annotated protein-coding genes.

|            | Type            | Number | Percent (%) |
|------------|-----------------|--------|-------------|
| Annotation | KEGG            | 13,482 | 85.0        |
|            | GO              | 10,979 | 69.2        |
|            | KOG             | 14,696 | 92.6        |
|            | SwissProt       | 14,945 | 94.2        |
|            | InterPro        | 14,891 | 93.8        |
|            | NR              | 15,382 | 96.9        |
| Total      | Annotated genes | 15,416 | 97.2        |
|            | Total Genes     | 15,868 | -           |

Note: “Annotation” is the annotation results of each database and the proportion of annotation coverage. “Annotated genes” represent non-redundant results based on annotations. “Total Genes” is the total number of protein-coding genes (annotated genes + unannotated genes).

**Table S4.** Statistical results of non-coding RNAs.

| Type  | Copy (w*) | Average length (bp) | Total length (bp) | Percentage (%) |
|-------|-----------|---------------------|-------------------|----------------|
| miRNA | 308       | 89.27               | 27,495            | 0.002402       |
| tRNA  | 329       | 75.18               | 24,735            | 0.002161       |
| rRNA  | 151       | 269.78              | 40,737            | 0.003559       |
| snRNA | 284       | 129.94              | 36,904            | 0.003224       |

Note: Abbreviations indicate transfer RNA (tRNA), ribosomal RNA (rRNA), small nuclear RNA (snRNA), and microRNA (miRNA).

**Table S5.** Positively selected genes' significantly enriched pathways in KEGG enrichment analysis.

| KO number | Pathway name                           | Gene number | P-value  | Corrected P-value |
|-----------|----------------------------------------|-------------|----------|-------------------|
| KO04360   | Axon guidance                          | 8           | 2.00E-04 | 4.20E-02          |
| KO04510   | Focal adhesion                         | 11          | 4.18E-04 | 4.28E-02          |
| KO03008   | Ribosome biogenesis in eukaryotes      | 19          | 5.09E-04 | 4.29E-02          |
| KO04151   | PI3K-Akt signaling pathway             | 18          | 8.59E-04 | 4.29E-02          |
| KO04724   | Glutamatergic synapse                  | 2           | 9.68E-04 | 4.29E-02          |
| KO00300   | Lysine biosynthesis                    | 3           | 9.91E-04 | 4.29E-02          |
| KO04072   | Phospholipase D signaling pathway      | 5           | 2.01E-03 | 7.64E-02          |
| KO04810   | Regulation of actin cytoskeleton       | 14          | 4.28E-03 | 0.1181            |
| KO04725   | Cholinergic synapse                    | 3           | 5.16E-03 | 0.1302            |
| KO04974   | Protein digestion and absorption       | 3           | 9.80E-03 | 0.1820            |
| KO04062   | Chemokine signaling pathway            | 8           | 0.0114   | 0.1820            |
| KO04612   | Antigen processing and presentation    | 11          | 0.0166   | 0.2511            |
| KO04921   | Oxytocin signaling pathway             | 10          | 0.0186   | 0.2575            |
| KO04012   | ErbB signaling pathway                 | 5           | 0.0187   | 0.2575            |
| KO04726   | Serotonergic synapse                   | 4           | 0.0217   | 0.2738            |
| KO04010   | MAPK signaling pathway                 | 18          | 0.0301   | 0.2868            |
| KO04660   | T cell receptor signaling pathway      | 7           | 0.0310   | 0.2868            |
| KO04664   | Fc epsilon RI signaling pathway        | 2           | 0.0312   | 0.2868            |
| KO04727   | GABAergic synapse                      | 3           | 0.0312   | 0.2868            |
| KO04666   | Fc gamma R-mediated phagocytosis       | 3           | 0.0312   | 0.2868            |
| KO04670   | Leukocyte transendothelial migration   | 6           | 0.0390   | 0.3378            |
| KO04662   | B cell receptor signaling pathway      | 3           | 0.0417   | 0.3417            |
| KO04662   | Thyroid hormone signaling pathway      | 6           | 0.0433   | 0.3417            |
| KO04662   | Adrenergic signaling in cardiomyocytes | 9           | 0.0488   | 0.3417            |
| KO04975   | Fat digestion and absorption           | 7           | 0.0462   | 0.3417            |
| KO04920   | Adipocytokine signaling pathway        | 6           | 0.0488   | 0.3417            |



**Table S6.** Positively selected genes associated with circadian rhythms and fat metabolism from KEGG enrichment analysis.

| Function         | Gene name | Pathway name (KO number)                  | Gene ID                                |
|------------------|-----------|-------------------------------------------|----------------------------------------|
| Circadian rhythm | PER3      | Circadian rhythm (KO04710)                | evm.model.FRAGSCAFF_SCAFFOLD_66.166    |
|                  | SKP1      | Circadian rhythm (KO04710)                | evm.model.ORIGINAL_SCAFFOLD_803.36.1   |
|                  | PRKAG2    | Circadian rhythm (KO04710)                | evm.model.FRAGSCAFF_SCAFFOLD_205.172.1 |
| Fat metabolism   | MOGAT2    | Fat digestion and absorption (KO04975)    | evm.model.FRAGSCAFF_SCAFFOLD_195.124   |
|                  | PLA2G10   | Fat digestion and absorption (KO04975)    | evm.model.FRAGSCAFF_SCAFFOLD_242.142   |
|                  | ABCG8     | Fat digestion and absorption (KO04975)    | evm.model.ORIGINAL_SCAFFOLD_2636.347   |
|                  | CEL       | Fat digestion and absorption (KO04975)    | evm.model.FRAGSCAFF_SCAFFOLD_183.2355  |
|                  | PLA2G3    | Fat digestion and absorption (KO04975)    | evm.model.ORIGINAL_SCAFFOLD_3106.270.1 |
|                  | PLA2G5    | Fat digestion and absorption (KO04975)    | evm.model.FRAGSCAFF_SCAFFOLD_66.297    |
|                  | SCARB1    | Fat digestion and absorption (KO04975)    | evm.model.FRAGSCAFF_SCAFFOLD_183.1779  |
|                  | G6PC2     | Adipocytokine signaling pathway (KO04920) | evm.model.ORIGINAL_SCAFFOLD_3574.260   |
|                  | RSPH10B   | Adipocytokine signaling pathway (KO04920) | evm.model.FRAGSCAFF_SCAFFOLD_196.301   |
|                  | CIDEA     | Adipocytokine signaling pathway (KO04920) | evm.model.ORIGINAL_SCAFFOLD_1430.189   |
|                  | POMC      | Adipocytokine signaling pathway (KO04920) | evm.model.FRAGSCAFF_SCAFFOLD_101.79    |
|                  | C1QTNF3   | Adipocytokine signaling pathway (KO04920) | evm.model.ORIGINAL_SCAFFOLD_2528.122   |

PPARA

Adipocytokine signaling pathway (KO04920)

evm.model.FRAGSCAFF\_SCAFFOLD\_183.929

---
